# Supplementary material
Source: publisher figshare collection journal article supplement (https://frontiersin.figshare.com/ndownloader/files/34201476)
Supplement: Supplementary file 1 [file 34201476]

**Supplemental Table 1**. Gradient for brevetoxin (PbTx) elution used in this study.

| **Time (min.)** | **A(%)** | **B(%)** |
| --- | --- | --- |
| 0 | 100 | 0 |
| 10 | 100 | 0 |
| 15 | 0 | 100 |
| 17 | 0 | 100 |
| 20 | 100 | 0 |
